# Supplementary material for: Do mixotrophic and phototrophic algae differ in their BPA removal capacity across a BPA gradient?
Source: Research Square preprint supplement (doi:10.21203/rs.3.rs-8366430/v1), 2025-12-23
Supplement: Supplementary file 1 [file eefc8661ca9d98165c3e4c98.docx]

**Table S1.** Pairwise comparisons between *Cryptomonas sp.* and *Scenedesmus sp. sp. sp.* across BPA treatments, incubation days, on cell abundance (CA), effect size of BPA on cell abundance , Cumulative growth rate (CGR), relative electron transport rate rETR, rETR: Chl *a*, Respiration rate (R), specific respiration rate (sR),effect size of BPA on respiration, BPA removal rate (C(CBR)%) and Specific cumulative removal rate (sCBR). The table shows estimated mean differences and p-values from post hoc tests based on repeated-measures ANOVA

| **Measure** | | | | | **Mean differences** | ***p-*value** |
| --- | --- | --- | --- | --- | --- | --- |
| **CA** | 5 ug L-1 | 1 | *Cryptomonas sp.* | *Scendesmus* sp. | -202500.000 | **<0.001** |
| 2 | *Cryptomonas sp.* | *Scendesmus* sp. | -252250.000 | **<0.001** |
| 3 | *Cryptomonas sp.* | *Scendesmus* sp. | -323750.000 | **<0.001** |
| 4 | *Cryptomonas sp.* | *Scendesmus* sp. | -480000.000 | **<0.001** |
| 10 ug L-1 | 1 | *Cryptomonas sp.* | *Scendesmus* sp. | -171250.000 | **<0.001** |
| 2 | *Cryptomonas sp.* | *Scendesmus* sp. | -245000.000 | **<0.001** |
| 3 | *Cryptomonas sp.* | *Scendesmus* sp. | -246250.000 | **<0.001** |
| 4 | *Cryptomonas sp.* | *Scendesmus* sp. | -385833.333 | **<0.001** |
| 50 ug L-1 | 1 | *Cryptomonas sp.* | *Scendesmus* sp. | -193750.000 | **<0.001** |
| 2 | *Cryptomonas sp.* | *Scendesmus* sp. | -327500.000 | **<0.001** |
| 3 | *Cryptomonas sp.* | *Scendesmus* sp. | -369583.333 | **<0.001** |
| 4 | *Cryptomonas sp.* | *Scendesmus* sp. | -377916.667 | **<0.001** |
| 100 ug L-1 | 1 | *Cryptomonas sp.* | *Scendesmus* sp. | -143750.000 | **<0.001** |
| 2 | *Cryptomonas sp.* | *Scendesmus* sp. | -248750.000 | **<0.001** |
| 3 | *Cryptomonas sp.* | *Scendesmus* sp. | -294583.333 | **<0.001** |
| 4 | *Cryptomonas sp.* | *Scendesmus* sp. | -401250.000 | **<0.001** |
| 1000 ug L-1 | 1 | *Cryptomonas sp.* | *Scendesmus* sp. | -128750.000 | **<0.001** |
| 2 | *Cryptomonas sp.* | *Scendesmus* sp. | -194583.333 | **<0.001** |
| 3 | *Cryptomonas sp.* | *Scendesmus* sp. | -259583.333 | **<0.001** |
| 4 | *Cryptomonas sp.* | *Scendesmus* sp. | -381500.000 | **<0.001** |
| **Effect size of BPA on CA** | 5 ug L-1 | 1 | *Cryptomonas sp.* | *Scendesmus* sp. | -1.319 | **<0.001** |
| 2 | *Cryptomonas sp.* | *Scendesmus* sp. | -0.360 | **<0.001** |
| 3 | *Cryptomonas sp.* | *Scendesmus* sp. | -0.241 | **<0.001** |
| 4 | *Cryptomonas sp.* | *Scendesmus* sp. | -0.193 | **<0.001** |
| 10 ug L-1 | 1 | *Cryptomonas sp.* | *Scendesmus* sp. | -0.497 | **<0.001** |
| 2 | *Cryptomonas sp.* | *Scendesmus* sp. | -0.435 | **<0.001** |
| 3 | *Cryptomonas sp.* | *Scendesmus* sp. | -0.127 | **<0.001** |
| 4 | *Cryptomonas sp.* | *Scendesmus* sp. | -0.146 | **<0.001** |
| 50 ug L-1 | 1 | *Cryptomonas sp.* | *Scendesmus* sp. | -0.703 | **<0.001** |
| 2 | *Cryptomonas sp.* | *Scendesmus* sp. | -0.687 | **<0.001** |
| 3 | *Cryptomonas sp.* | *Scendesmus* sp. | -0.397 | **<0.001** |
| 4 | *Cryptomonas sp.* | *Scendesmus* sp. | -0.226 | **<0.001** |
| 100 ug L-1 | 1 | *Cryptomonas sp.* | *Scendesmus* sp. | -0.761 | **<0.001** |
| 2 | *Cryptomonas sp.* | *Scendesmus* sp. | -0.670 | **<0.001** |
| 3 | *Cryptomonas sp.* | *Scendesmus* sp. | -0.351 | **<0.001** |
| 4 | *Cryptomonas sp.* | *Scendesmus* sp. | -0.178 | **<0.001** |
| 1000 ug L-1 | 1 | *Cryptomonas sp.* | *Scendesmus* sp. | -1.126 | **<0.001** |
| 2 | *Cryptomonas sp.* | *Scendesmus* sp. | -0.419 | **<0.001** |
| 3 | *Cryptomonas sp.* | *Scendesmus* sp. | -0.368 | **<0.001** |
| 4 | *Cryptomonas sp.* | *Scendesmus* sp. | -0.294 | **<0.001** |
| **GCA** | 5 ug L-1 | 1 | *Cryptomonas sp.* | *Scendesmus* sp. | -0.439 | **<0.001** |
| 2 | *Cryptomonas sp.* | *Scendesmus* sp. | -0.056 | **<0.001** |
| 3 | *Cryptomonas sp.* | *Scendesmus* sp. | -0.367 | **<0.001** |
| 4 | *Cryptomonas sp.* | *Scendesmus* sp. | -0.174 | **<0.001** |
| 10 ug L-1 | 1 | *Cryptomonas sp.* | *Scendesmus* sp. | 0.356 | **<0.001** |
| 2 | *Cryptomonas sp.* | *Scendesmus* sp. | -0.183 | **<0.001** |
| 3 | *Cryptomonas sp.* | *Scendesmus* sp. | 0.099 | **<0.001** |
| 4 | *Cryptomonas sp.* | *Scendesmus* sp. | 0.178 | **<0.001** |
| 50 ug L-1 | 1 | *Cryptomonas sp.* | *Scendesmus* sp. | 0.087 | **<0.001** |
| 2 | *Cryptomonas sp.* | *Scendesmus* sp. | -0.611 | **<0.001** |
| 3 | *Cryptomonas sp.* | *Scendesmus* sp. | -0.771 | **<0.001** |
| 4 | *Cryptomonas sp.* | *Scendesmus* sp. | -0.284 | **<0.001** |
| 100 ug L-1 | 1 | *Cryptomonas sp.* | *Scendesmus* sp. | 0.011 | **<0.001** |
| 2 | *Cryptomonas sp.* | *Scendesmus* sp. | -0.451 | **<0.001** |
| 3 | *Cryptomonas sp.* | *Scendesmus* sp. | -0.554 | **<0.001** |
| 4 | *Cryptomonas sp.* | *Scendesmus* sp. | -0.055 | **<0.001** |
| 1000 ug L-1 | 1 | *Cryptomonas sp.* | *Scendesmus* sp. | -0.202 | **<0.001** |
| 2 | *Cryptomonas sp.* | *Scendesmus* sp. | -0.126 | **<0.001** |
| 3 | *Cryptomonas sp.* | *Scendesmus* sp. | -0.452 | **<0.001** |
| 4 | *Cryptomonas sp.* | *Scendesmus* sp. | -0.518 | **<0.001** |
| **rETR** | 5 ug L-1 | 1 | *Cryptomonas sp.* | *Scendesmus* sp. | -375510.000 | **<0.001** |
| 2 | *Cryptomonas sp.* | *Scendesmus* sp. | -520050.000 | **<0.001** |
| 3 | *Cryptomonas sp.* | *Scendesmus* sp. | -513510.000 | **<0.001** |
| 4 | *Cryptomonas sp.* | *Scendesmus* sp. | -45940.000 | **<0.001** |
| 10 ug L-1 | 1 | *Cryptomonas sp.* | *Scendesmus* sp. | -466260.000 | **<0.001** |
| 2 | *Cryptomonas sp.* | *Scendesmus* sp. | -541860.000 | **<0.001** |
| 3 | *Cryptomonas sp.* | *Scendesmus* sp. | -350760.000 | **<0.001** |
| 4 | *Cryptomonas sp.* | *Scendesmus* sp. | -135520.000 | **<0.001** |
| 50 ug L-1 | 1 | *Cryptomonas sp.* | *Scendesmus* sp. | -444666.000 | **<0.001** |
| 2 | *Cryptomonas sp.* | *Scendesmus* sp. | -476100.000 | **<0.001** |
| 3 | *Cryptomonas sp.* | *Scendesmus* sp. | -455940.000 | **<0.001** |
| 4 | *Cryptomonas sp.* | *Scendesmus* sp. | -155302.000 | **<0.001** |
| 100 ug L-1 | 1 | *Cryptomonas sp.* | *Scendesmus* sp. | -444180.000 | **<0.001** |
| 2 | *Cryptomonas sp.* | *Scendesmus* sp. | -542010.000 | **<0.001** |
| 3 | *Cryptomonas sp.* | *Scendesmus* sp. | -501420.000 | **<0.001** |
| 4 | *Cryptomonas sp.* | *Scendesmus* sp. | -118780.000 | **<0.001** |
| 1000 ug L-1 | 1 | *Cryptomonas sp.* | *Scendesmus* sp. | -653376.000 | **<0.001** |
| 2 | *Cryptomonas sp.* | *Scendesmus* sp. | -879600.000 | **<0.001** |
| 3 | *Cryptomonas sp.* | *Scendesmus* sp. | -660750.000 | **<0.001** |
| 4 | *Cryptomonas sp.* | *Scendesmus* sp. | -616452.000 | **<0.001** |
| **ETRr: Chl *a*** | 5 ug L-1 | 1 | *Cryptomonas sp.* | *Scendesmus* sp. | -3603.290 | **<0.001** |
| 2 | *Cryptomonas sp.* | *Scendesmus* sp. | -2175.133 | **<0.001** |
| 3 | *Cryptomonas sp.* | *Scendesmus* sp. | -1590.618 | **<0.001** |
| 4 | *Cryptomonas sp.* | *Scendesmus* sp. | -46.372 | **<0.001** |
| 10 ug L-1 | 1 | *Cryptomonas sp.* | *Scendesmus* sp. | -4720.793 | **<0.001** |
| 2 | *Cryptomonas sp.* | *Scendesmus* sp. | -1782.033 | **<0.001** |
| 3 | *Cryptomonas sp.* | *Scendesmus* sp. | -552.542 | **<0.001** |
| 4 | *Cryptomonas sp.* | *Scendesmus* sp. | -347.269 | **<0.001** |
| 50 ug L-1 | 1 | *Cryptomonas sp.* | *Scendesmus* sp. | -2826.171 | **<0.001** |
| 2 | *Cryptomonas sp.* | *Scendesmus* sp. | -1830.091 | **<0.001** |
| 3 | *Cryptomonas sp.* | *Scendesmus* sp. | -1077.029 | **<0.001** |
| 4 | *Cryptomonas sp.* | *Scendesmus* sp. | 515.794 | **<0.001** |
| 100 ug L-1 | 1 | *Cryptomonas sp.* | *Scendesmus* sp. | -3123.020 | **<0.001** |
| 2 | *Cryptomonas sp.* | *Scendesmus* sp. | -1377.726 | **<0.001** |
| 3 | *Cryptomonas sp.* | *Scendesmus* sp. | -1045.483 | **<0.001** |
| 4 | *Cryptomonas sp.* | *Scendesmus* sp. | 48.200 | **<0.001** |
| 1000 ug L-1 | 1 | *Cryptomonas sp.* | *Scendesmus* sp. | -5734.106 | **<0.001** |
| 2 | *Cryptomonas sp.* | *Scendesmus* sp. | -3731.540 | **<0.001** |
| 3 | *Cryptomonas sp.* | *Scendesmus* sp. | -724.930 | **<0.001** |
| 4 | *Cryptomonas sp.* | *Scendesmus* sp. | 4218.414 | **<0.001** |
| **R** | 5 ug L-1 | 1 | *Cryptomonas sp.* | *Scendesmus* sp. | -20.315 | **<0.001** |
| 2 | *Cryptomonas sp.* | *Scendesmus* sp. | -26.580 | **<0.001** |
| 3 | *Cryptomonas sp.* | *Scendesmus* sp. | 58.151 | **<0.001** |
| 4 | *Cryptomonas sp.* | *Scendesmus* sp. | -55.674 | **<0.001** |
| 10 ug L-1 | 1 | *Cryptomonas sp.* | *Scendesmus* sp. | -32.305 | **<0.001** |
| 2 | *Cryptomonas sp.* | *Scendesmus* sp. | -32.574 | **<0.001** |
| 3 | *Cryptomonas sp.* | *Scendesmus* sp. | -17.008 | **<0.001** |
| 4 | *Cryptomonas sp.* | *Scendesmus* sp. | -31.813 | **<0.001** |
| 50 ug L-1 | 1 | *Cryptomonas sp.* | *Scendesmus* sp. | -39.130 | **<0.001** |
| 2 | *Cryptomonas sp.* | *Scendesmus* sp. | -26.359 | **<0.001** |
| 3 | *Cryptomonas sp.* | *Scendesmus* sp. | -52.414 | **<0.001** |
| 4 | *Cryptomonas sp.* | *Scendesmus* sp. | -16.368 | **<0.001** |
| 100 ug L-1 | 1 | *Cryptomonas sp.* | *Scendesmus* sp. | -47.260 | **<0.001** |
| 2 | *Cryptomonas sp.* | *Scendesmus* sp. | 1.307 | **<0.001** |
| 3 | *Cryptomonas sp.* | *Scendesmus* sp. | -26.155 | **<0.001** |
| 4 | *Cryptomonas sp.* | *Scendesmus* sp. | -43.441 | **<0.001** |
| 1000 ug L-1 | 1 | *Cryptomonas sp.* | *Scendesmus* sp. | 15.472 | **<0.001** |
| 2 | *Cryptomonas sp.* | *Scendesmus* sp. | 11.384 | **<0.001** |
| 3 | *Cryptomonas sp.* | *Scendesmus* sp. | 32.498 | **<0.001** |
| 4 | *Cryptomonas sp.* | *Scendesmus* sp. | 91.581 | **<0.001** |
| **sR** | 5 ug L-1 | 1 | *Cryptomonas sp.* | *Scendesmus* sp. | 0.001 | **<0.001** |
| 2 | *Cryptomonas sp.* | *Scendesmus* sp. | 0.000 | **<0.001** |
| 3 | *Cryptomonas sp.* | *Scendesmus* sp. | 0.001 | **<0.001** |
| 4 | *Cryptomonas sp.* | *Scendesmus* sp. | 0.000 | **<0.001** |
| 10 ug L-1 | 1 | *Cryptomonas sp.* | *Scendesmus* sp. | 0.000 | **<0.001** |
| 2 | *Cryptomonas sp.* | *Scendesmus* sp. | 0.000 | **<0.001** |
| 3 | *Cryptomonas sp.* | *Scendesmus* sp. | 0.000 | **<0.001** |
| 4 | *Cryptomonas sp.* | *Scendesmus* sp. | 0.000 | **<0.001** |
| 50 ug L-1 | 1 | *Cryptomonas sp.* | *Scendesmus* sp. | 0.000 | **<0.001** |
| 2 | *Cryptomonas sp.* | *Scendesmus* sp. | 0.001 | **<0.001** |
| 3 | *Cryptomonas sp.* | *Scendesmus* sp. | 0.001 | **<0.001** |
| 4 | *Cryptomonas sp.* | *Scendesmus* sp. | 0.001 | **<0.001** |
| 100 ug L-1 | 1 | *Cryptomonas sp.* | *Scendesmus* sp. | 0.000 | **<0.001** |
| 2 | *Cryptomonas sp.* | *Scendesmus* sp. | 0.002 | **<0.001** |
| 3 | *Cryptomonas sp.* | *Scendesmus* sp. | 0.001 | **<0.001** |
| 4 | *Cryptomonas sp.* | *Scendesmus* sp. | 0.000 | **<0.001** |
| 1000 ug L-1 | 1 | *Cryptomonas sp.* | *Scendesmus* sp. | 0.002 | **<0.001** |
| 2 | *Cryptomonas sp.* | *Scendesmus* sp. | 0.001 | **<0.001** |
| **Effect size of BPA on R** | 5 ug L-1 | 1 | *Cryptomonas sp.* | *Scendesmus* sp. | 9.5 | 0.19 |
| 2 | *Cryptomonas sp.* | *Scendesmus* sp. | 18.45 | 0.07 |
| 3 | *Cryptomonas sp.* | *Scendesmus* sp. | -45.85 | **<0.001** |
| 4 | *Cryptomonas sp.* | *Scendesmus* sp. | -132.48 | **<0.001** |
| 10 ug L-1 | 1 | *Cryptomonas sp.* | *Scendesmus* sp. | -29.44 | **<0.001** |
| 2 | *Cryptomonas sp.* | *Scendesmus* sp. | -36.65 | **<0.001** |
| 3 | *Cryptomonas sp.* | *Scendesmus* sp. | -145.17 | **0.001** |
| 4 | *Cryptomonas sp.* | *Scendesmus* sp. | -116.56 | **<0.001** |
| 50 ug L-1 | 1 | *Cryptomonas sp.* | *Scendesmus* sp. | -39.86 | **<0.001** |
| 2 | *Cryptomonas sp.* | *Scendesmus* sp. | -22.48 | **<0.001** |
| 3 | *Cryptomonas sp.* | *Scendesmus* sp. | -236.24 | **0.30** |
| 4 | *Cryptomonas sp.* | *Scendesmus* sp. | -115.33 | **<0.001** |
| 100 ug L-1 | 1 | *Cryptomonas sp.* | *Scendesmus* sp. | -62.21 | **<0.001** |
| 2 | *Cryptomonas sp.* | *Scendesmus* sp. | 47.413 | **<0.001** |
| 3 | *Cryptomonas sp.* | *Scendesmus* sp. | -176.41 | **<0.001** |
| 4 | *Cryptomonas sp.* | *Scendesmus* sp. | -109.96 | **<0.001** |
| 1000 ug L-1 | 1 | *Cryptomonas sp.* | *Scendesmus* sp. | 50.69 | **<0.001** |
| 2 | *Cryptomonas sp.* | *Scendesmus* sp. | 50.59 | **<0.001** |
| 3 | *Cryptomonas sp.* | *Scendesmus* sp. | -70.65 | **<0.001** |
| 4 | *Cryptomonas sp.* | *Scendesmus* sp. | -20.31 | **0.004** |
| **BPA removal rate** | 5 ug L-1 | 1 | *Cryptomonas sp.* | *Scendesmus* sp. | -31.135 | **<0.001** |
| 2 | *Cryptomonas sp.* | *Scendesmus* sp. | -30.249 | **<0.001** |
| 3 | *Cryptomonas sp.* | *Scendesmus* sp. | -35.648 | **<0.001** |
| 4 | *Cryptomonas sp.* | *Scendesmus* sp. | -24.314 | **<0.001** |
| 10 ug L-1 | 1 | *Cryptomonas sp.* | *Scendesmus* sp. | -8.384 | **<0.001** |
| 2 | *Cryptomonas sp.* | *Scendesmus* sp. | -5.045 | **<0.001** |
| 3 | *Cryptomonas sp.* | *Scendesmus* sp. | -3.112 | **<0.001** |
| 4 | *Cryptomonas sp.* | *Scendesmus* sp. | -1.228 | **<0.001** |
| 50 ug L-1 | 1 | *Cryptomonas sp.* | *Scendesmus* sp. | 2.129 | **<0.001** |
| 2 | *Cryptomonas sp.* | *Scendesmus* sp. | -5.387 | **<0.001** |
| 3 | *Cryptomonas sp.* | *Scendesmus* sp. | 12.494 | **<0.001** |
| 4 | *Cryptomonas sp.* | *Scendesmus* sp. | 6.665 | **<0.001** |
| 100 ug L-1 | 1 | *Cryptomonas sp.* | *Scendesmus* sp. | 3.430 | **<0.001** |
| 2 | *Cryptomonas sp.* | *Scendesmus* sp. | 0.251 | **<0.001** |
| 3 | *Cryptomonas sp.* | *Scendesmus* sp. | 0.930 | **<0.001** |
| 4 | *Cryptomonas sp.* | *Scendesmus* sp. | 10.190 | **<0.001** |
| 1000 ug L-1 | 1 | *Cryptomonas sp.* | *Scendesmus* sp. | -7.152 | **<0.001** |
| 2 | *Cryptomonas sp.* | *Scendesmus* sp. | -8.696 | **<0.001** |
| 3 | *Cryptomonas sp.* | *Scendesmus* sp. | 4.987 | **<0.001** |
| 4 | *Cryptomonas sp.* | *Scendesmus* sp. | 0.375 | **<0.001** |
| **sCBR** | 5 ug L-1 | 1 | *Cryptomonas sp.* | *Scendesmus* sp. | -4.986E-05 | **<0.001** |
| 2 | *Cryptomonas sp.* | *Scendesmus* sp. | 3.107E-05 | **<0.001** |
| 3 | *Cryptomonas sp.* | *Scendesmus* sp. | 0.000 | **<0.001** |
| 4 | *Cryptomonas sp.* | *Scendesmus* sp. | 0.000 | **<0.001** |
| 10 ug L-1 | 1 | *Cryptomonas sp.* | *Scendesmus* sp. | 2.797E-05 | **<0.001** |
| 2 | *Cryptomonas sp.* | *Scendesmus* sp. | 0.000 | **<0.001** |
| 3 | *Cryptomonas sp.* | *Scendesmus* sp. | 0.000 | **<0.001** |
| 4 | *Cryptomonas sp.* | *Scendesmus* sp. | 0.000 | **<0.001** |
| 50 ug L-1 | 1 | *Cryptomonas sp.* | *Scendesmus* sp. | 5.080E-05 | **<0.001** |
| 2 | *Cryptomonas sp.* | *Scendesmus* sp. | 0.000 | **<0.001** |
| 3 | *Cryptomonas sp.* | *Scendesmus* sp. | 0.001 | **<0.001** |
| 4 | *Cryptomonas sp.* | *Scendesmus* sp. | 0.001 | **<0.001** |
| 100 ug L-1 | 1 | *Cryptomonas sp.* | *Scendesmus* sp. | 8.487E-05 | **<0.001** |
| 2 | *Cryptomonas sp.* | *Scendesmus* sp. | 0.000 | **<0.001** |
| 3 | *Cryptomonas sp.* | *Scendesmus* sp. | 0.000 | **<0.001** |
| 4 | *Cryptomonas sp.* | *Scendesmus* sp. | 0.000 | **<0.001** |
| 1000 ug L-1 | 1 | *Cryptomonas sp.* | *Scendesmus* sp. | 0.000 | **<0.001** |
| 2 | *Cryptomonas sp.* | *Scendesmus* sp. | 0.000 | **<0.001** |
| 3 | *Cryptomonas sp.* | *Scendesmus* sp. | 0.001 | **<0.001** |
| 4 | *Cryptomonas sp.* | *Scendesmus* sp. | 0.001 | **<0.001** |

**Table S2.** Bonferroni-adjusted pairwise post hoc comparisons among period incubation within each species (*Cryptomonas* sp. and *Scenedesmus* sp.) across the BPA-gradient on cell abundance (CA), effect size of BPA on cell abundance, cumulative growth rate (CGR), relative electron transport rate (rETR), rETR normalized to chlorophyll *a* (rETR:Chl *a*), respiration rate (R), specific respiration rate (sR), effect size of BPA on respiration, cumulative BPA removal (CBR), and specific cumulative BPA removal (sCBR).

| Variable | BPA-gradient | Algae | Day (I) | Day (J) | *p-*value | Algae | Day (I) | Day (J) | *p-*value |
| --- | --- | --- | --- | --- | --- | --- | --- | --- | --- |
|
| CA | 5 ug L-1 | *Cryptomonas* sp. | 1 | 2 | **< 0.01** | *Scenedesmus* sp. | 1 | 2 | < 0.01 |
| 3 | **<0.01** | 3 | **<0.01** |
| 4 | **<0.01** | 4 | **<0.01** |
| 2 | 3 | 1.00 | 2 | 3 | < 0.01 |
| 4 | 0.95 | 4 | **<0.01** |
| 3 | 4 | 1.00 | 3 | 4 | **<0.01** |
| 10 ug L-1 | *Cryptomonas* sp. | 1 | 2 | 0.50 | *Scenedesmus* sp. | 1 | 2 | < 0.01 |
| 3 | **<0.01** | 3 | **<0.01** |
| 4 | 0.56 | 4 | **<0.01** |
| 2 | 3 | **<0.01** | 2 | 3 | < 0.01 |
| 4 | **0.05** | 4 | **<0.01** |
| 3 | 4 | 0.20 | 3 | 4 | **<0.01** |
| 50 ug L-1 | *Cryptomonas* sp. | 1 | 2 | **0.05** | *Scenedesmus* sp. | 1 | 2 | **<0.01** |
| 3 | **0.02** | 3 | **<0.01** |
| 4 | **0.01** | 4 | < 0.01 |
| 2 | 3 | 1.00 | 2 | 3 | **<0.01** |
| 4 | 1.00 | 4 | **<0.01** |
| 3 | 4 | 1.00 | 3 | 4 | 1.00 |
| 100 ug L-1 | *Cryptomonas* sp. | 1 | 2 | 1.00 | *Scenedesmus* sp. | 1 | 2 | **<0.01** |
| 3 | 1.00 | 3 | **<0.01** |
| 4 | **<0.01** | 4 | < 0.01 |
| 2 | 3 | 1.00 | 2 | 3 | **<0.01** |
| 4 | **<0.01** | 4 | **<0.01** |
| 3 | 4 | 0.07 | 3 | 4 | **<0.01** |
| 1000 ug L-1 | *Cryptomonas* sp. | 1 | 2 | **<0.01** | *Scenedesmus* sp. | 1 | 2 | **<0.01** |
| 3 | 1.00 | 3 | < 0.01 |
| 4 | 1.00 | 4 | **<0.01** |
| 2 | 3 | 0.17 | 2 | 3 | **<0.01** |
| 4 | **<0.01** | 4 | **<0.01** |
| 3 | 4 | 1.00 | 3 | 4 | **<0.01** |
| Effect size of BPA on CA | 5 ug L-1 | *Cryptomonas* sp. | 1 | 2 | **<0.01** | *Scenedesmus* sp. | 1 | 2 | < 0.01 |
| 3 | **<0.01** | 3 | **<0.01** |
| 4 | **<0.01** | 4 | **<0.01** |
| 2 | 3 | **<0.01** | 2 | 3 | **<0.01** |
| 4 | **<0.01** | 4 | **<0.01** |
| 3 | 4 | **<0.01** | 3 | 4 | < 0.01 |
| 10 ug L-1 | *Cryptomonas* sp. | 1 | 2 | **<0.01** | *Scenedesmus* sp. | 1 | 2 | **<0.01** |
| 3 | **<0.01** | 3 | **<0.01** |
| 4 | **<0.01** | 4 | **<0.01** |
| 2 | 3 | **<0.01** | 2 | 3 | **<0.01** |
| 4 | **<0.01** | 4 | < 0.01 |
| 3 | 4 | **<0.01** | 3 | 4 | **<0.01** |
| 50 ug L-1 | *Cryptomonas* sp. | 1 | 2 | **<0.01** | *Scenedesmus* sp. | 1 | 2 | **<0.01** |
| 3 | **<0.01** | 3 | **<0.01** |
| 4 | **<0.01** | 4 | **<0.01** |
| 2 | 3 | 1.00 | 2 | 3 | < 0.01 |
| 4 | 1.00 | 4 | **<0.01** |
| 3 | 4 | **0.04** | 3 | 4 | **<0.01** |
| 100 ug L-1 | *Cryptomonas* sp. | 1 | 2 | 1.00 | *Scenedesmus* sp. | 1 | 2 | **0.03** |
| 3 | **0.02** | 3 | **<0.01** |
| 4 | **<0.01** | 4 | **<0.01** |
| 2 | 3 | **<0.01** | 2 | 3 | < 0.01 |
| 4 | **<0.01** | 4 | **<0.01** |
| 3 | 4 | **<0.01** | 3 | 4 | **<0.01** |
| 1000 ug L-1 | *Cryptomonas* sp. | 1 | 2 | **<0.01** | *Scenedesmus* sp. | 1 | 2 | 1.00 |
| 3 | **<0.01** | 3 | **<0.01** |
| 4 | **<0.01** | 4 | **<0.01** |
| 2 | 3 | **<0.01** | 2 | 3 | < 0.01 |
| 4 | **<0.01** | 4 | **<0.01** |
| 3 | 4 | **1.00** | 3 | 4 | **<0.01** |
| GCR | 5 ug L-1 | *Cryptomonas* sp. | 1 | 2 | **<0.01** | *Scenedesmus* sp. | 1 | 2 | 1.00 |
| 3 | **<0.01** | 3 | **<0.01** |
| 4 | **<0.01** | 4 | **<0.01** |
| 2 | 3 | **<0.01** | 2 | 3 | < 0.01 |
| 4 | 0.31 | 4 | **<0.01** |
| 3 | 4 | **<0.01** | 3 | 4 | **<0.01** |
| 10 ug L-1 | *Cryptomonas* sp. | 1 | 2 | **<0.01** | *Scenedesmus* sp. | 1 | 2 | **0.02** |
| 3 | **<0.01** | 3 | 0.43 |
| 4 | **<0.01** | 4 | **<0.01** |
| 2 | 3 | **<0.01** | 2 | 3 | 0.48 |
| 4 | **<0.01** | 4 | 1.00 |
| 3 | 4 | 1.00 | 3 | 4 | 0.08 |
| 50 ug L-1 | *Cryptomonas* sp. | 1 | 2 | **<0.01** | *Scenedesmus* sp. | 1 | 2 | 0.66 |
| 3 | **<0.01** | 3 | 0.10 |
| 4 | **<0.01** | 4 | **<0.01** |
| 2 | 3 | **<0.01** | 2 | 3 | 1.00 |
| 4 | 1.00 | 4 | **<0.01** |
| 3 | 4 | **<0.01** | 3 | 4 | **<0.01** |
| 100 ug L-1 | *Cryptomonas* sp. | 1 | 2 | **<0.01** | *Scenedesmus* sp. | 1 | 2 | 0.11 |
| 3 | **<0.01** | 3 | **<0.01** |
| 4 | **0.03** | 4 | **<0.01** |
| 2 | 3 | 1.00 | 2 | 3 | 0.07 |
| 4 | **<0.01** | 4 | 0.29 |
| 3 | 4 | **<0.01** | 3 | 4 | 1.00 |
| 1000 ug L-1 | *Cryptomonas* sp. | 1 | 2 | **<0.01** | *Scenedesmus* sp. | 1 | 2 | **0.01** |
| 3 | 0.19 | 3 | **<0.01** |
| 4 | **<0.01** | 4 | **<0.01** |
| 2 | 3 | **<0.01** | 2 | 3 | 0.10 |
| 4 | **<0.01** | 4 | 0.43 |
| 3 | 4 | **0.01** | 3 | 4 | 1.00 |
| ETR | 5 ug L-1 | *Cryptomonas* sp. | 1 | 2 | **<0.01** | *Scenedesmus* sp. | 1 | 2 | 0.11 |
| 3 | 0.12 | 3 | 1.00 |
| 4 | 0.28 | 4 | **<0.01** |
| 2 | 3 | 1.00 | 2 | 3 | 1.00 |
| 4 | 1.00 | 4 | **<0.01** |
| 3 | 4 | 1.00 | 3 | 4 | **<0.01** |
| 10 ug L-1 | *Cryptomonas* sp. | 1 | 2 | 1.00 | *Scenedesmus* sp. | 1 | 2 | **0.02** |
| 3 | 0.80 | 3 | **<0.01** |
| 4 | 1.00 | 4 | **<0.01** |
| 2 | 3 | 0.89 | 2 | 3 | **<0.01** |
| 4 | 1.00 | 4 | **<0.01** |
| 3 | 4 | 1.00 | 3 | 4 | **0.02** |
| 50 ug L-1 | *Cryptomonas* sp. | 1 | 2 | 0.13 | *Scenedesmus* sp. | 1 | 2 | 1.00 |
| 3 | 0.60 | 3 | 0.92 |
| 4 | 1.00 | 4 | **<0.01** |
| 2 | 3 | 1.00 | 2 | 3 | 1.00 |
| 4 | 1.00 | 4 | **<0.01** |
| 3 | 4 | 1.00 | 3 | 4 | **<0.01** |
| 100 ug L-1 | *Cryptomonas* sp. | 1 | 2 | **0.01** | *Scenedesmus* sp. | 1 | 2 | 1.00 |
| 3 | **0.03** | 3 | 0.40 |
| 4 | 0.17 | 4 | **<0.01** |
| 2 | 3 | 1.00 | 2 | 3 | 0.22 |
| 4 | 1.00 | 4 | **<0.01** |
| 3 | 4 | 1.00 | 3 | 4 | **<0.01** |
| 1000 ug L-1 | *Cryptomonas* sp. | 1 | 2 | **<0.01** | *Scenedesmus* sp. | 1 | 2 | 0.32 |
| 3 | **<0.01** | 3 | **<0.01** |
| 4 | **<0.01** | 4 | **<0.01** |
| 2 | 3 | 1.00 | 2 | 3 | **<0.01** |
| 4 | 0.60 | 4 | **<0.01** |
| 3 | 4 | 0.78 | 3 | 4 | 1.00 |
| ETR: Chl *a* | 5 ug L-1 | *Cryptomonas* sp. | 1 | 2 | 1.00 | *Scenedesmus* sp. | 1 | 2 | **<0.01** |
| 3 | 1.00 | 3 | **<0.01** |
| 4 | 0.14 | 4 | **<0.01** |
| 2 | 3 | 1.00 | 2 | 3 | **<0.01** |
| 4 | **0.00** | 4 | **<0.01** |
| 3 | 4 | **0.03** | 3 | 4 | **<0.01** |
| 10 ug L-1 | *Cryptomonas* sp. | 1 | 2 | 1.00 | *Scenedesmus* sp. | 1 | 2 | **<0.01** |
| 3 | 1.00 | 3 | **<0.01** |
| 4 | 1.00 | 4 | **<0.01** |
| 2 | 3 | 1.00 | 2 | 3 | **<0.01** |
| 4 | 1.00 | 4 | **<0.01** |
| 3 | 4 | 1.00 | 3 | 4 | 1.00 |
| 50 ug L-1 | *Cryptomonas* sp. | 1 | 2 | 0.26 | *Scenedesmus* sp. | 1 | 2 | **<0.01** |
| 3 | 0.96 | 3 | **<0.01** |
| 4 | **<0.01** | 4 | **<0.01** |
| 2 | 3 | 1.00 | 2 | 3 | **<0.01** |
| 4 | **<0.01** | 4 | **<0.01** |
| 3 | 4 | **<0.01** | 3 | 4 | **0.04** |
| 100 ug L-1 | *Cryptomonas* sp. | 1 | 2 | 1.00 | *Scenedesmus* sp. | 1 | 2 | **<0.01** |
| 3 | 0.42 | 3 | **<0.01** |
| 4 | 1.00 | 4 | **<0.01** |
| 2 | 3 | 1.00 | 2 | 3 | **<0.01** |
| 4 | 0.29 | 4 | **<0.01** |
| 3 | 4 | 0.36 | 3 | 4 | **<0.01** |
| 1000 ug L-1 | *Cryptomonas* sp. | 1 | 2 | **<0.01** | *Scenedesmus* sp. | 1 | 2 | **<0.01** |
| 3 | 0.34 | 3 | **<0.01** |
| 4 | **<0.01** | 4 | **<0.01** |
| 2 | 3 | **<0.01** | 2 | 3 | **<0.01** |
| 4 | **<0.01** | 4 | **<0.01** |
| 3 | 4 | **<0.01** | 3 | 4 | 1.00 |
| R | 5 ug L-1 | *Cryptomonas* sp. | 1 | 2 | 0.73 | *Scenedesmus* sp. | 1 | 2 | 1.00 |
| 3 | **<0.01** | 3 | **<0.01** |
| 4 | **<0.01** | 4 | **<0.01** |
| 2 | 3 | **<0.01** | 2 | 3 | **0.05** |
| 4 | 0.66 | 4 | **0.01** |
| 3 | 4 | **<0.01** | 3 | 4 | **0.00** |
| 10 ug L-1 | *Cryptomonas* sp. | 1 | 2 | **0.01** | *Scenedesmus* sp. | 1 | 2 | **0.01** |
| 3 | 0.09 | 3 | **0.05** |
| 4 | 0.24 | 4 | 0.32 |
| 2 | 3 | **<0.01** | 2 | 3 | 0.11 |
| 4 | **<0.01** | 4 | **<0.01** |
| 3 | 4 | 1.00 | 3 | 4 | **<0.01** |
| 50 ug L-1 | *Cryptomonas* sp. | 1 | 2 | 0.09 | *Scenedesmus* sp. | 1 | 2 | **<0.01** |
| 3 | 1.00 | 3 | **<0.01** |
| 4 | **<0.01** | 4 | 0.60 |
| 2 | 3 | **0.01** | 2 | 3 | **<0.01** |
| 4 | **<0.01** | 4 | **<0.01** |
| 3 | 4 | **<0.01** | 3 | 4 | 0.22 |
| 100 ug L-1 | *Cryptomonas* sp. | 1 | 2 | **<0.01** | *Scenedesmus* sp. | 1 | 2 | 1.00 |
| 3 | **<0.01** | 3 | **0.04** |
| 4 | 1.00 | 4 | 1.00 |
| 2 | 3 | **<0.01** | 2 | 3 | **0.01** |
| 4 | **<0.01** | 4 | 1.00 |
| 3 | 4 | **<0.01** | 3 | 4 | 0.31 |
| 1000 ug L-1 | *Cryptomonas* sp. | 1 | 2 | 0.78 | *Scenedesmus* sp. | 1 | 2 | 1.00 |
| 3 | **<0.01** | 3 | **<0.01** |
| 4 | **<0.01** | 4 | **<0.01** |
| 2 | 3 | **<0.01** | 2 | 3 | **<0.01** |
| 4 | **<0.01** | 4 | **<0.01** |
| 3 | 4 | **<0.01** | 3 | 4 | 0.82 |
| Effect size of BPA on R | 5 ug L-1 | *Cryptomonas* sp. | 1 | 2 | 1.00 | *Scenedesmus* sp. | 1 | 2 | **1.00** |
| 3 | 0.07 | 3 | **<0.01** |
| 4 | **<0.01** | 4 | **<0.01** |
| 2 | 3 | **0.03** | 2 | 3 | **<0.01** |
| 4 | **<0.01** | 4 | **0.02** |
| 3 | 4 | **<0.01** | 3 | 4 | 1.00 |
| 10 ug L-1 | *Cryptomonas* sp. | 1 | 2 | 0.14 | *Scenedesmus* sp. | 1 | 2 | 0.10 |
| 3 | **<0.01** | 3 | **<0.01** |
| 4 | **<0.01** | 4 | **0.01** |
| 2 | 3 | **0.46** | 2 | 3 | **<0.01** |
| 4 | **0.01** | 4 | **<0.01** |
| 3 | 4 | 0.49 | 3 | 4 | **<0.01** |
| 50 ug L-1 | *Cryptomonas* sp. | 1 | 2 | 0.36 | *Scenedesmus* sp. | 1 | 2 | **0.00** |
| 3 | **<0.01** | 3 | **<0.01** |
| 4 | **<0.01** | 4 | **0.02** |
| 2 | 3 | **<0.01** | 2 | 3 | **<0.01** |
| 4 | **0.01** | 4 | **<0.01** |
| 3 | 4 | 1.00 | 3 | 4 | **<0.01** |
| 100 ug L-1 | *Cryptomonas* sp. | 1 | 2 | **<0.01** | *Scenedesmus* sp. | 1 | 2 | 1.00 |
| 3 | 1.00 | 3 | **<0.01** |
| 4 | **<0.01** | 4 | 0.21 |
| 2 | 3 | **<0.01** | 2 | 3 | **<0.01** |
| 4 | **<0.01** | 4 | 0.93 |
| 3 | 4 | **<0.01** | 3 | 4 | **<0.01** |
| 1000 ug L-1 | *Cryptomonas* sp. | 1 | 2 | 1.00 | *Scenedesmus* sp. | 1 | 2 | 1.00 |
| 3 | **0.00** | 3 | **<0.01** |
| 4 | **<0.01** | 4 | **<0.01** |
| 2 | 3 | **0.00** | 2 | 3 | **<0.01** |
| 4 | **0.08** | 4 | **<0.01** |
| 3 | 4 | 1.00 | 3 | 4 | **<0.01** |
| sR | 5 ug L-1 | *Cryptomonas* sp. | 1 | 2 | **<0.01** | *Scenedesmus* sp. | 1 | 2 | 0.98 |
| 3 | 1.00 | 3 | **0.01** |
| 4 | **<0.01** | 4 | **<0.01** |
| 2 | 3 | **<0.01** | 2 | 3 | 1.00 |
| 4 | 1.00 | 4 | 1.00 |
| 3 | 4 | **0.00** | 3 | 4 | 1.00 |
| 10 ug L-1 | *Cryptomonas* sp. | 1 | 2 | 0.06 | *Scenedesmus* sp. | 1 | 2 | 0.40 |
| 3 | 0.12 | 3 | 0.07 |
| 4 | 1.00 | 4 | **<0.01** |
| 2 | 3 | 1.00 | 2 | 3 | 1.00 |
| 4 | 0.11 | 4 | 1.00 |
| 3 | 4 | 0.29 | 3 | 4 | 1.00 |
| 50 ug L-1 | *Cryptomonas* sp. | 1 | 2 | 1.00 | *Scenedesmus* sp. | 1 | 2 | 0.07 |
| 3 | **<0.01** | 3 | 0.31 |
| 4 | **<0.01** | 4 | **0.02** |
| 2 | 3 | **<0.01** | 2 | 3 | 1.00 |
| 4 | **<0.01** | 4 | 1.00 |
| 3 | 4 | **<0.01** | 3 | 4 | 1.00 |
| 100 ug L-1 | *Cryptomonas* sp. | 1 | 2 | **<0.01** | *Scenedesmus* sp. | 1 | 2 | 0.14 |
| 3 | **<0.01** | 3 | **0.01** |
| 4 | **<0.01** | 4 | **<0.01** |
| 2 | 3 | **<0.01** | 2 | 3 | 1.00 |
| 4 | **<0.01** | 4 | 1.00 |
| 3 | 4 | **<0.01** | 3 | 4 | 1.00 |
| 1000 ug L-1 | *Cryptomonas* sp. | 1 | 2 | **<0.01** | *Scenedesmus* sp. | 1 | 2 | 0.52 |
| 3 | **<0.01** | 3 | 0.66 |
| 4 | **<0.01** | 4 | **0.02** |
| 2 | 3 | **<0.01** | 2 | 3 | 1.00 |
| 4 | **<0.01** | 4 | 1.00 |
| 3 | 4 | **<0.01** | 3 | 4 | 1.00 |
| BPA removal rate | 5 ug L-1 | *Cryptomonas* sp. | 1 | 2 | **<0.01** | *Scenedesmus* sp. | 1 | 2 | **<0.01** |
| 3 | **<0.01** | 3 | **<0.01** |
| 4 | **<0.01** | 4 | < 0.01 |
| 2 | 3 | **<0.01** | 2 | 3 | **<0.01** |
| 4 | **<0.01** | 4 | **<0.01** |
| 3 | 4 | **<0.01** | 3 | 4 | 1.00 |
| 10 ug L-1 | *Cryptomonas* sp. | 1 | 2 | **<0.01** | *Scenedesmus* sp. | 1 | 2 | 0.33 |
| 3 | **<0.01** | 3 | **<0.01** |
| 4 | **<0.01** | 4 | **<0.01** |
| 2 | 3 | **<0.01** | 2 | 3 | **<0.01** |
| 4 | **<0.01** | 4 | **<0.01** |
| 3 | 4 | **<0.01** | 3 | 4 | **<0.01** |
| 50 ug L-1 | *Cryptomonas* sp. | 1 | 2 | 0.07 | *Scenedesmus* sp. | 1 | 2 | < 0.01 |
| 3 | **<0.01** | 3 | **<0.01** |
| 4 | **<0.01** | 4 | **<0.01** |
| 2 | 3 | **<0.01** | 2 | 3 | 1.00 |
| 4 | **<0.01** | 4 | **<0.01** |
| 3 | 4 | **0.01** | 3 | 4 | **<0.01** |
| 100 ug L-1 | *Cryptomonas* sp. | 1 | 2 | **<0.01** | *Scenedesmus* sp. | 1 | 2 | < 0.01 |
| 3 | **<0.01** | 3 | **<0.01** |
| 4 | **<0.01** | 4 | **<0.01** |
| 2 | 3 | **0.02** | 2 | 3 | **<0.01** |
| 4 | **<0.01** | 4 | **<0.01** |
| 3 | 4 | **<0.01** | 3 | 4 | < 0.01 |
| 1000 ug L-1 | *Cryptomonas* sp. | 1 | 2 | **0.03** | *Scenedesmus* sp. | 1 | 2 | **<0.01** |
| 3 | **<0.01** | 3 | **<0.01** |
| 4 | **<0.01** | 4 | **<0.01** |
| 2 | 3 | **<0.01** | 2 | 3 | 1.00 |
| 4 | **<0.01** | 4 | **<0.01** |
| 3 | 4 | 1.00 | 3 | 4 | **<0.01** |
| sBr | 5 ug L-1 | *Cryptomonas* sp. | 1 | 2 | **0.03** | *Scenedesmus* sp. | 1 | 2 | 1.00 |
| 3 | **<0.01** | 3 | 1.00 |
| 4 | **<0.01** | 4 | 0.11 |
| 2 | 3 | 0.25 | 2 | 3 | 1.00 |
| 4 | **<0.01** | 4 | 0.92 |
| 3 | 4 | **<0.01** | 3 | 4 | 1.00 |
| 10 ug L-1 | *Cryptomonas* sp. | 1 | 2 | **<0.01** | *Scenedesmus* sp. | 1 | 2 | 1.00 |
| 3 | **<0.01** | 3 | 1.00 |
| 4 | **<0.01** | 4 | 1.00 |
| 2 | 3 | 1.00 | 2 | 3 | 1.00 |
| 4 | **<0.01** | 4 | 1.00 |
| 3 | 4 | **<0.01** | 3 | 4 | 1.00 |
| 50 ug L-1 | *Cryptomonas* sp. | 1 | 2 | **<0.01** | *Scenedesmus* sp. | 1 | 2 | 1.00 |
| 3 | **<0.01** | 3 | 0.93 |
| 4 | **<0.01** | 4 | **0.04** |
| 2 | 3 | **<0.01** | 2 | 3 | 1.00 |
| 4 | **<0.01** | 4 | 1.00 |
| 3 | 4 | **0.04** | 3 | 4 | 1.00 |
| 100 ug L-1 | *Cryptomonas* sp. | 1 | 2 | **<0.01** | *Scenedesmus* sp. | 1 | 2 | 0.35 |
| 3 | **<0.01** | 3 | 0.15 |
| 4 | **<0.01** | 4 | 0.10 |
| 2 | 3 | **0.04** | 2 | 3 | 1.00 |
| 4 | **<0.01** | 4 | 1.00 |
| 3 | 4 | 0.86 | 3 | 4 | 1.00 |
| 1000 ug L-1 | *Cryptomonas* sp. | 1 | 2 | 0.19 | *Scenedesmus* sp. | 1 | 2 | 1.00 |
| 3 | **<0.01** | 3 | 1.00 |
| 4 | **<0.01** | 4 | 1.00 |
| 2 | 3 | **<0.01** | 2 | 3 | 1.00 |
| 4 | **<0.01** | 4 | 1.00 |
| 3 | 4 | **<0.01** | 3 | 4 | 1.00 |

**Table S3.** Pairwise comparisons are based on estimated marginal means; p-values were adjusted using the Bonferroni correction on cell abundance (CA), effect size of BPA on cell abundance, cumulative growth rate (CGR), relative electron transport rate (rETR), rETR normalized to chlorophyll *a* (rETR:Chl *a*), respiration rate (R), specific respiration rate (sR), effect size of BPA on respiration, cumulative BPA removal (CBR), and specific cumulative BPA removal (sCBR).

| **Variables** | **Algae Species** | **BPAi** | **BPA j** | ***p-*value** | **Variables** | **Algae Species** | **BPAi** | **BPA j** |
| --- | --- | --- | --- | --- | --- | --- | --- | --- |
| **CA** | *Cryptomonas* sp*.* | 5 | 10 | **<0.01** | *Scendesmus* sp. | 5 | 10 | **<0.01** |
| 50 | **<0.01** | 50 | **<0.01** |
| 100 | **<0.01** | 100 | **<0.01** |
| 1000 | **<0.01** | 1000 | **<0.01** |
| 10 | 50 | **<0.01** | 10 | 50 | **<0.01** |
| 100 | **<0.01** | 100 | **<0.01** |
| 1000 | **<0.01** | 1000 | **<0.01** |
| 50 | 100 | 1.000 | 50 | 100 | **<0.01** |
| 1000 | **<0.01** | 1000 | **<0.01** |
| 100 | 1000 | **<0.01** | 100 | 1000 | **<0.01** |
| **Effect size of BPA on cell abundance** | *Cryptomonas* sp*.* | 5 | 10 | **<0.01** | *Scendesmus* sp. | 5 | 10 | 1.000 |
| 50 | **<0.01** | 50 | 0.134 |
| 100 | **<0.01** | 100 | **<0.01** |
| 1000 | **<0.01** | 1000 | **<0.01** |
| 10 | 50 | **<0.01** | 10 | 50 | **0.020** |
| 100 | **<0.01** | 100 | **<0.01** |
| 1000 | **<0.01** | 1000 | **<0.01** |
| 50 | 100 | **<0.01** | 50 | 100 | **<0.01** |
| 1000 | **<0.01** | 1000 | **<0.01** |
| 100 | 1000 | **<0.01** | 100 | 1000 | **<0.01** |
| **CGR** | *Cryptomonas* sp*.* | 5 | 10 | **<0.01** | *Scendesmus* sp. | 5 | 10 | **0.001** |
| 50 | **<0.01** | 50 | 1.000 |
| 100 | **<0.01** | 100 | **<0.01** |
| 1000 | **<0.01** | 1000 | **<0.01** |
| 10 | 50 | **<0.01** | 10 | 50 | **<0.01** |
| 100 | **<0.01** | 100 | **<0.01** |
| 1000 | **<0.01** | 1000 | **<0.01** |
| 50 | 100 | 0.064 | 50 | 100 | **<0.01** |
| 1000 | **<0.01** | 1000 | **<0.01** |
| 100 | 1000 | **<0.01** | 100 | 1000 | **<0.01** |
| **ETR** | *Cryptomonas* sp*.* | 5 | 10 | 1.000 | *Scendesmus* sp. | 5 | 5 | 1.000 |
| 50 | 1.000 |  | 1.000 |
| 100 | 0.970 |  | 1.000 |
| 1000 | **<0.01** |  | 1.000 |
| 10 | 50 | 1.000 | 10 | 10 | 1.000 |
| 100 | 1.000 |  | 1.000 |
| 1000 | **<0.01** |  | 1.000 |
| 50 | 100 | 1.000 | 50 | 50 | 1.000 |
| 1000 | **<0.01** |  | 1.000 |
| 100 | 1000 | **<0.01** | 100 | 100 | 1.000 |
| **ETR: CHl *a*** | *Cryptomonas* sp*.* | 5 | 10 | 1.000 | *Scendesmus* sp. | 5 | 10 | 1.000 |
| 50 | 0.626 | 50 | **<0.01** |
| 100 | 1.000 | 100 | **<0.01** |
| 1000 | **<0.01** | 1000 | **<0.01** |
| 10 | 50 | 0.069 | 10 | 50 | **<0.01** |
| 100 | 1.000 | 100 | **<0.01** |
| 1000 | **<0.01** | 1000 | **<0.01** |
| 50 | 100 | **0.015** | 50 | 100 | 0.138 |
| 1000 | **<0.01** | 1000 | **<0.01** |
| 100 | 1000 | **<0.01** | 100 | 1000 | **<0.01** |
| **R** | *Cryptomonas* sp*.* | 5 | 10 | **<0.01** | *Scendesmus* sp. | 5 | 10 | 0.229 |
| 50 | **<0.01** | 50 | **<0.01** |
| 100 | **<0.01** | 100 | **0.046** |
| 1000 | **<0.01** | 1000 | **<0.01** |
| 10 | 50 | **0.012** | 10 | 50 | **<0.01** |
| 100 | 1.000 | 100 | 1.000 |
| 1000 | **<0.01** | 1000 | **<0.01** |
| 50 | 100 | **0.031** | 50 | 100 | **<0.01** |
| 1000 | **<0.01** | 1000 | **<0.01** |
| 100 | 1000 | **<0.01** | 100 | 1000 | **<0.01** |
| **Effect size of BPA on respiration** | *Cryptomonas* sp*.* | 5 | 10 | **<0.01** | *Scendesmus* sp. | 5 | 10 | **0.029** |
| 50 | **<0.01** | 50 | **<0.01** |
| 100 | 0.087 | 100 | **<0.01** |
| 1000 | **<0.01** | 1000 | **<0.01** |
| 10 | 50 | 0.810 | 10 | 50 | **<0.01** |
| 100 | **0.005** | 100 | 0.874 |
| 1000 | **<0.01** | 1000 | **<0.01** |
| 50 | 100 | 0.344 | 50 | 100 | **<0.01** |
| 1000 | **<0.01** | 1000 | **<0.01** |
| 100 | 1000 | **<0.01** | 100 | 1000 | **<0.01** |
| **sR** | *Cryptomonas* sp*.* | 5 | 10 | **<0.01** | *Scendesmus* sp. | 5 | 10 | 1.000 |
| 50 | 0.866 | 50 | 1.000 |
| 100 | 1.000 | 100 | 1.000 |
| 1000 | **<0.01** | 1000 | 1.000 |
| 10 | 50 | **<0.01** | 10 | 50 | 1.000 |
| 100 | **<0.01** | 100 | 1.000 |
| 1000 | **<0.01** | 1000 | 1.000 |
| 50 | 100 | 1.000 | 50 | 100 | 1.000 |
| 1000 | **<0.01** | 1000 | 1.000 |
| 100 | 1000 | **<0.01** | 100 | 1000 | 1.000 |
| **Cumulative BPA removal** | *Cryptomonas* sp*.* | 5 | 10 | 0.058 | *Scendesmus* sp. | 5 | 10 | **<0.01** |
| 50 | 0.534 | 50 | **<0.01** |
| 100 | 1.000 | 100 | **<0.01** |
| 1000 | 0.557 | 1000 | **<0.01** |
| 10 | 50 | 1.000 | 10 | 50 | **<0.01** |
| 100 | 0.911 | 100 | **<0.01** |
| 1000 | 1.000 | 1000 | **0.029** |
| 50 | 100 | 1.000 | 50 | 100 | 1.000 |
| 1000 | 1.000 | 1000 | **<0.01** |
| 100 | 1000 | 1.000 | 100 | 1000 | **<0.01** |
| **sBPR** | *Cryptomonas* sp*.* | 5 | 10 | 1.000 | *Scendesmus* sp. | 5 | 10 | 0.081 |
| 50 | **0.000** | 50 | **0.003** |
| 100 | **0.000** | 100 | **0.004** |
| 1000 | **0.000** | 1000 | 0.240 |
| 10 | 50 | **0.000** | 10 | 50 | 1.000 |
| 100 | **0.000** | 100 | 1.000 |
| 1000 | **0.000** | 1000 | 1.000 |
| 50 | 100 | 0.103 | 50 | 100 | 1.000 |
| 1000 | **0.000** | 1000 | 0.645 |
| 100 | 1000 | **0.000** | 100 | 1000 | 0.818 |
